# Supplementary material for: Osteoglycin, a novel coordinator of bone and glucose homeostasis
Source: PubMed Central journal article supplement — Mol Metab. 2018 May 8;13:30–44. doi: 10.1016/j.molmet.2018.05.004 (PMC6026319; doi:10.1016/j.molmet.2018.05.004), 2018-05-08

## A *Ogn* wildtype exon 2

ATGGAGACTGTGCACTCTACATTTCTCCTGCTACTCTTCGTGCCTCTGACACAGCAAG  
CACCACAGTCGCAGCTGGACTCACATGTTAACTATGAGTATGCAACAGGCAATTCTGA  
AGAAACCAAATTTAGCCAGGATTATGAAGATAAATACCTGGATGGGAAAAGTATTAAG

METVHSTFLLLLFVPLTQQAPQSQLDSHVNYEYATGNSEETKFSQDYEDKYLDGKSIK

## *Ogn*<sup>-/-</sup> exon 2 - 21bp deletion

ATGGAGACTGTGCACTCTACATTTCTCCTGCTACTCTTCGTGCCTCTGACACAGCAAG  
CACCAC.....TTAACTATGAGTATGCAACAGGCAATTCTGA  
AGAAACCAAATTTAGCCAGGATTATGAAGATAAATACCTGGATGGGAAAAGTATTAAG

METVHSTFLLLLFVPLTQQAP.....LNYEYATGNSEETKFSQDYEDKYLDGKSIK

## B

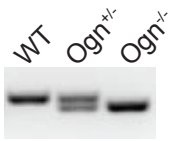

## C

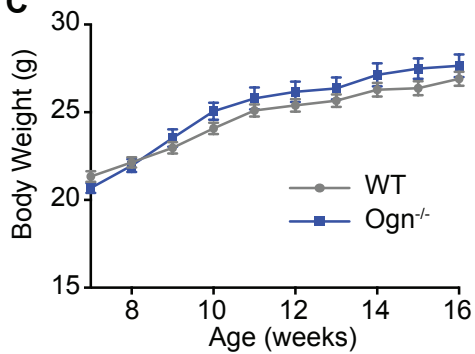

## D

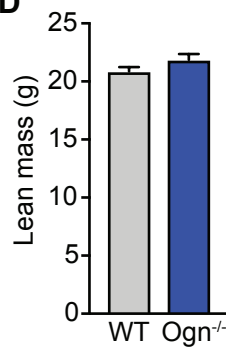

## E

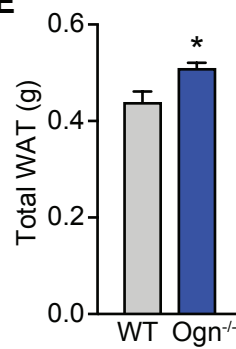

## F

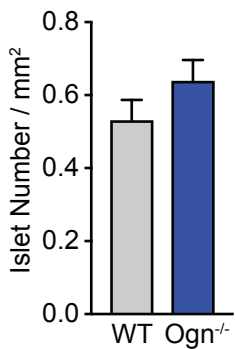

## G

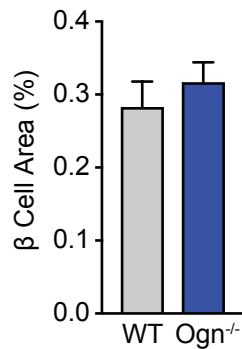

Supplement: mmc1.pdf [file mmc1.pdf]
