# Supplementary figures and images for: Osteoglycin, a novel coordinator of bone and glucose homeostasis
Source: PubMed Central journal article supplement — Mol Metab. 2018 May 8;13:30–44. doi: 10.1016/j.molmet.2018.05.004 (PMC6026319; doi:10.1016/j.molmet.2018.05.004), 2018-05-08

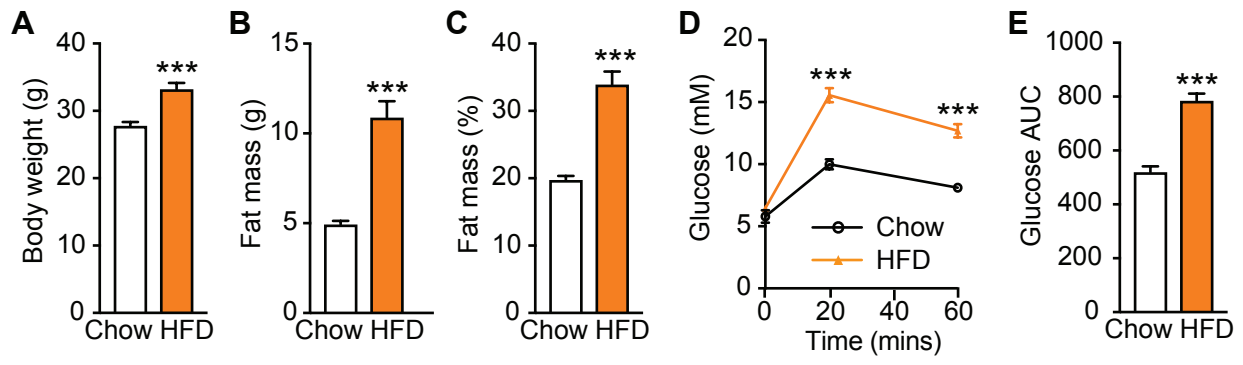

Supplementary Figure 2

Supplement: mmc2.pdf [file mmc2.pdf]
